# Supplementary material
Source: PubMed Central journal article supplement (PMC11028330)
Supplement: 262_2018_2273_MOESM1_ESM.pdf [file 262_2018_2273_MOESM1_ESM.pdf]

# Supplementary Figure 1

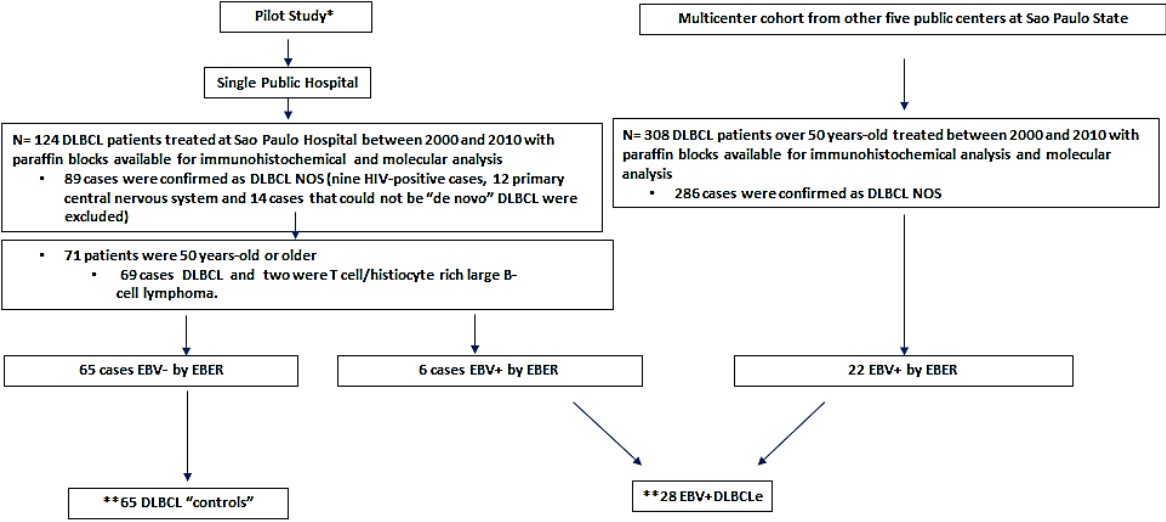

\*\*Ratio 2.3 controls/case: Comparable according to age, gender, Ann Arbor Stage and IPI (Table 1)

**Study Design.** Origin of EBV+DLBCL cases from pilot and multicenter study.

EBER = EBV- encoded RNA.

**Supplementary Figure 2**

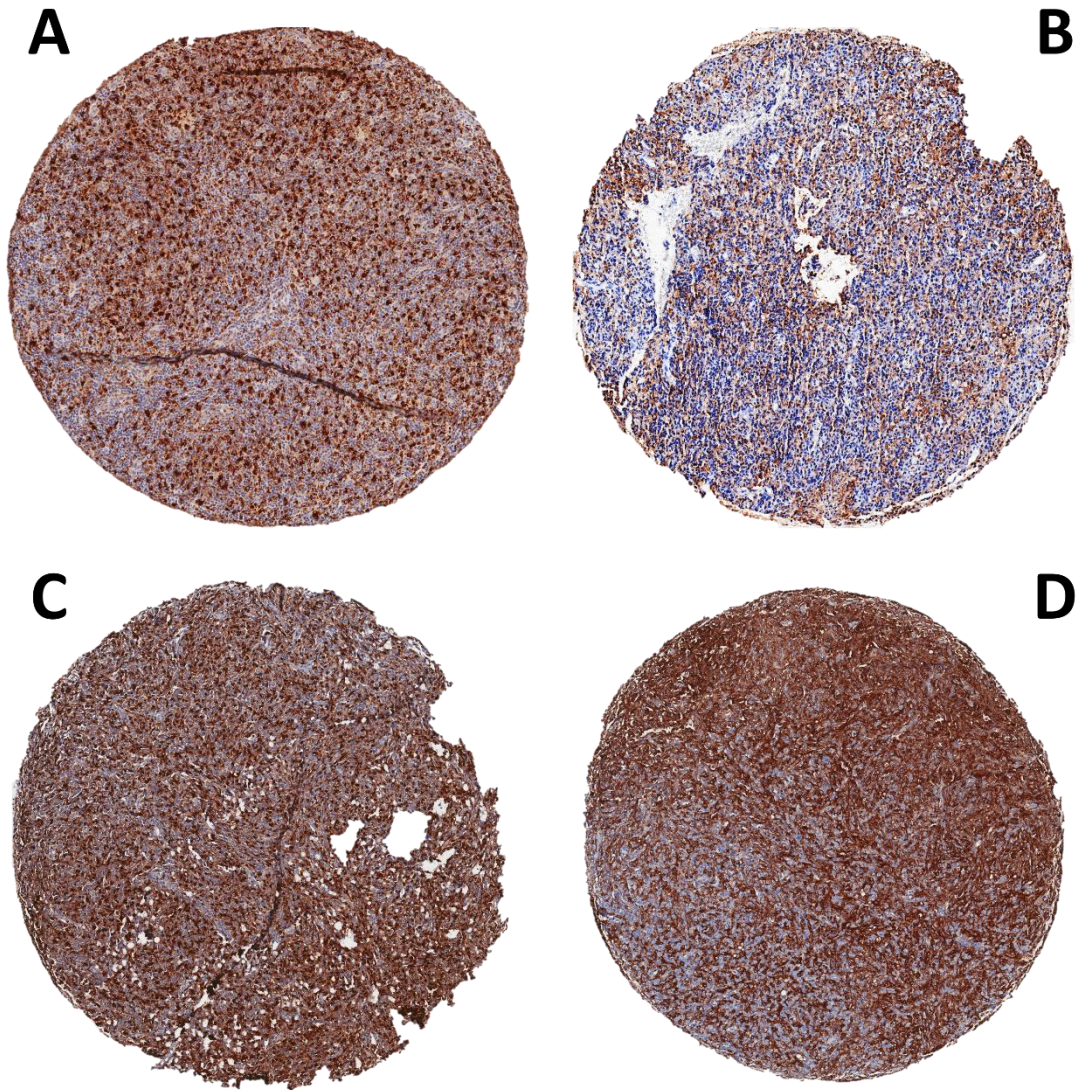

**Immunohistochemistry staining of macrophage markers in EBV-negative DLBCL and EBV+DLBCL.** (a and b) Examples of high CD68 and CD163 expression, respectively, in EBV-negative DLBCL. Magnification: x40. (c and d) Examples of high CD68 and CD163 expression, respectively, in EBV+DLBCL. Magnification: x40.

Supplementary Figure 3

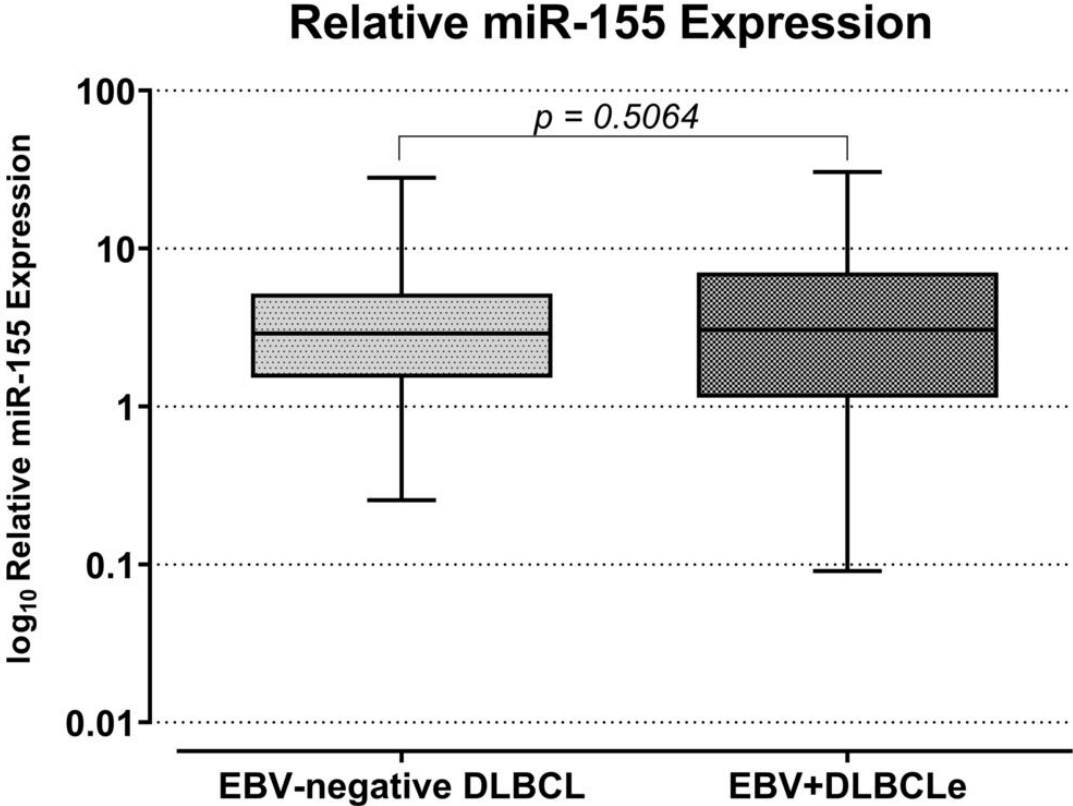

Relative expression of miR-155 in EBV-negative and EBV+DLBCL by qPCR. There was no statistically significant difference between the medians of the two groups evaluated ( $p = 0.5064$ , Mann-Whitney test).

Supplementary Figure 4

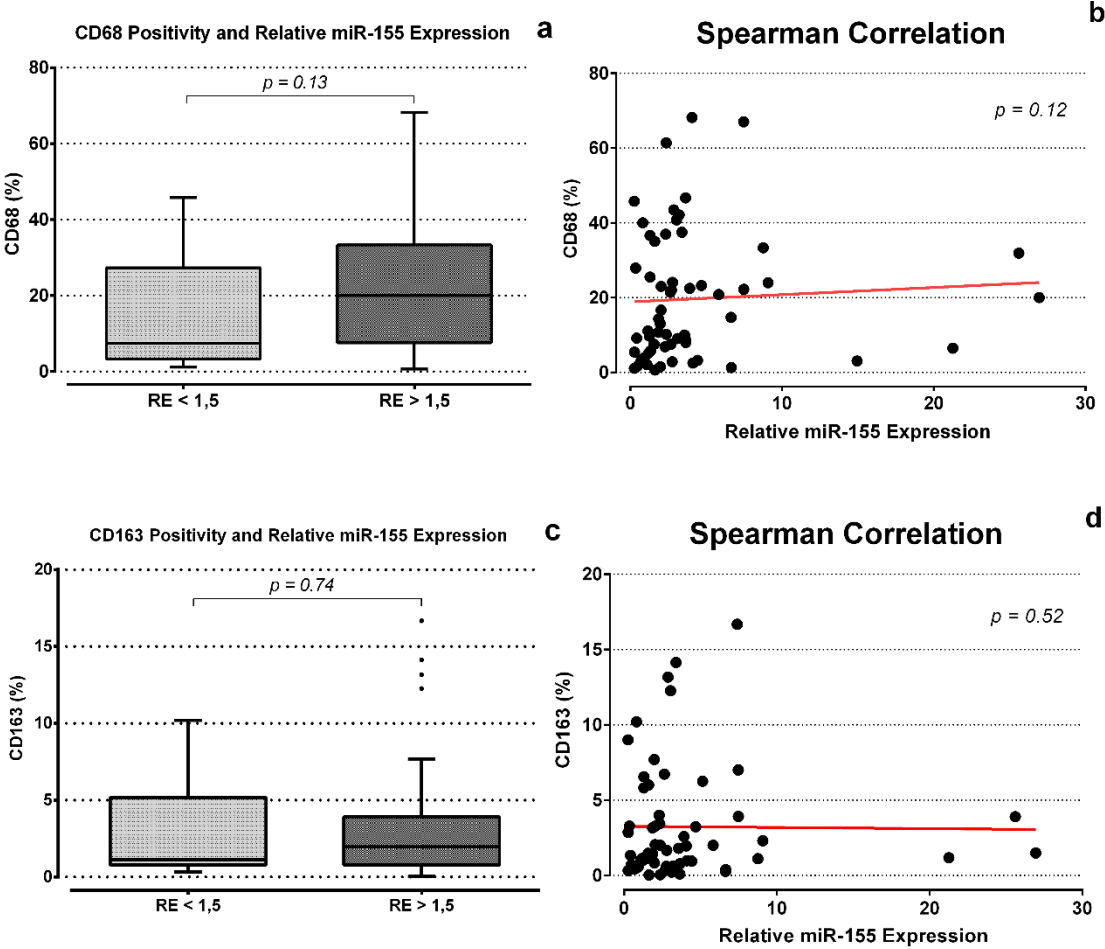

CD68, CD163, and relative expression of miR-155 in EBV-negative DLBCL. (a, and c) The figures show CD68, and CD163 as a function of the relative expression of miR-155, p-values were obtained with the Mann-Whitney test (b, and d) Spearman correlation between CD68, and CD163 with miR-155 relative expression.

## Supplementary Figure 5

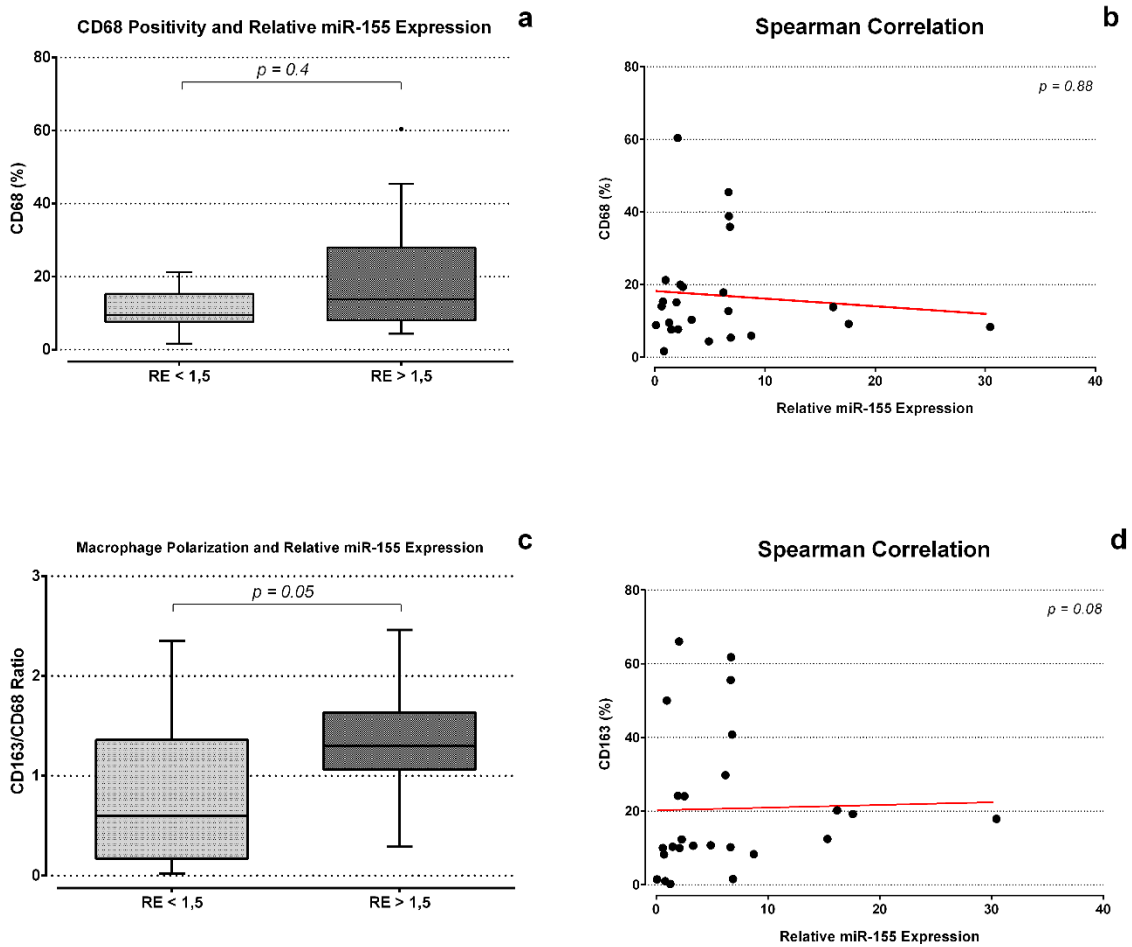

**CD68, macrophage polarization, and relative expression of miR-155 in EBV + DLBCL.** (a, and c) The figures show CD68, and CD163/CD68 ratio as a function of the relative expression of miR-155, p-values were obtained with the Mann-Whitney test. (b, and d) Spearman correlation between CD68, and CD163 with miR-155 relative expression.

# Supplementary Figure 6

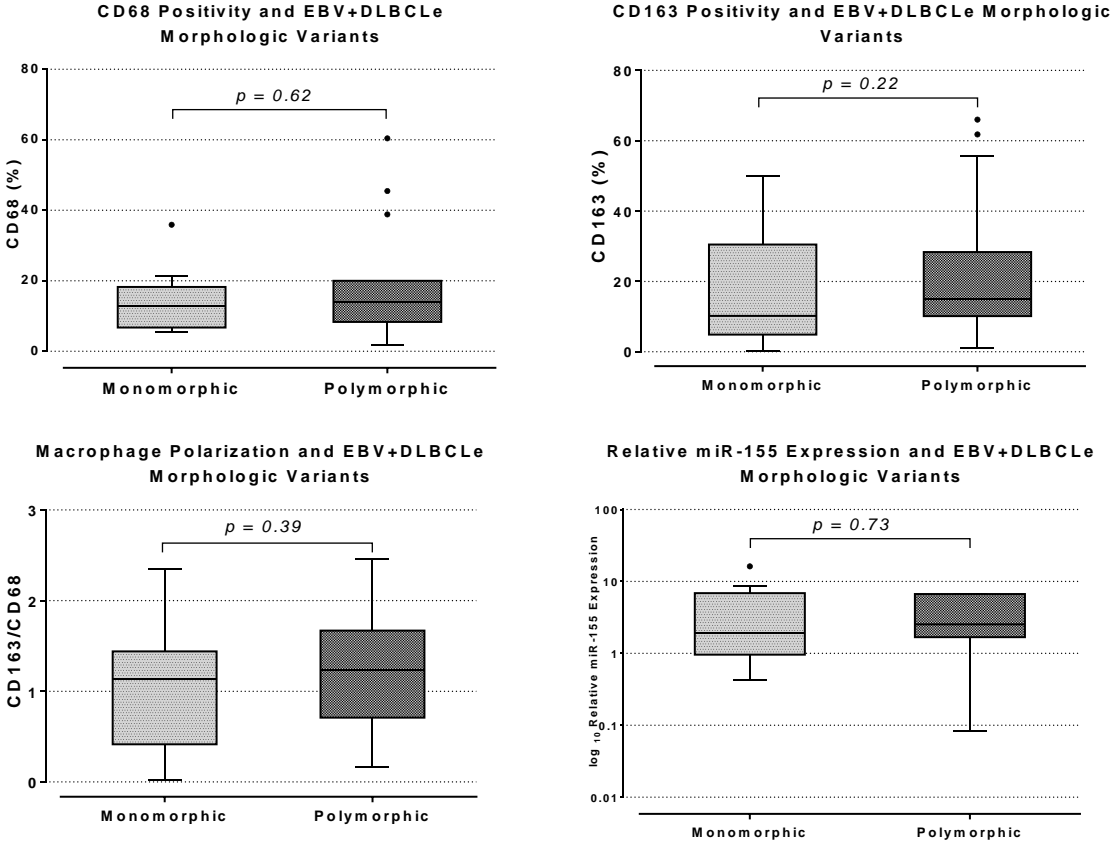

CD68, CD163, and macrophage polarization markers as a function of histological classification of EBV+DLBCL. No association between the studied parameters and the histological variants of EBV+DLBCL was found.

## Supplementary Table 1

Clinical data of patients  $\geq 50$  years-old with DLBCL according to the presence of the Epstein-Barr virus.

|                                        | <b>EBV+DLBCLe</b>                 | <b>EBV-negative DLBCL</b>         | <b>p*</b> |
|----------------------------------------|-----------------------------------|-----------------------------------|-----------|
| <b>Age</b>                             | 51 – 88 years<br>Median: 68 years | 50 – 85 years<br>Median: 67 years |           |
| <b>Gender</b>                          |                                   |                                   |           |
| <i>Female</i>                          | 16 (57.2%)                        | 36 (55.4%)                        | 0.8755    |
| <i>Male</i>                            | 12 (42.8%)                        | 29 (44.6%)                        |           |
| <b>Ann Arbor Staging System</b>        |                                   |                                   |           |
| <i>I/II</i>                            | 10 (38.4%)                        | 25 (38.5%)                        | 1.0000    |
| <i>III/IV</i>                          | 16 (61.6%)                        | 40 (61.5%)                        |           |
| <i>Unavailable</i>                     | 2                                 | 0                                 |           |
| <b>IPI</b>                             |                                   |                                   |           |
| $\leq 2$                               | 12 (57.1%)                        | 29 (46.7%)                        | 0.2057    |
| $> 2$                                  | 9 (42.9%)                         | 33 (53.3%)                        |           |
| <i>Unavailable</i>                     | 7                                 | 3                                 |           |
| <b>EBV+DLBCLe Morphologic Variants</b> |                                   |                                   |           |
| <i>Monomorphic</i>                     | 11 (39.3%)                        | -                                 |           |
| <i>Polymorphic</i>                     | 17 (60.7%)                        | -                                 |           |
